# Supplementary material
Source: PubMed Central journal article supplement (PMC2630894)
Supplement: en.2008-0984_2.pdf [file en.2008-0984_2.pdf]

| Gene Name        |            | Primer Set Sequences   | Length |
|------------------|------------|------------------------|--------|
| Ago1             | F: 5' - 3' | AAGTCGGACAGGAGCAGAAA   | 20mer  |
|                  | R: 5' - 3' | GAAACTTGCACTTCGCATCA   | 20mer  |
| Ago2             | F: 5' - 3' | TTCATCGTGGTGACAGAAGAG  | 20mer  |
|                  | R: 5' - 3' | ATGCCAGCGTGACTACACAG   | 20mer  |
| Ago3             | F: 5' - 3' | AGCTCCATGAATGGAATCG    | 20mer  |
|                  | R: 5' - 3' | CAACCACCTCCCTGTTCACT   | 20mer  |
| Ago4             | F: 5' - 3' | TATTATGCCCGGCTTGAGC    | 20mer  |
|                  | R: 5' - 3' | ACATCGTGTGCTGGGTATCA   | 20mer  |
| GAPDH            | F: 5' - 3' | ATCCCATCACCATCTTCCAG   | 20mer  |
|                  | R: 5' - 3' | TTCTAGACGGCAGGTCAGGT   | 20mer  |
| $\beta$ -Actin   | F: 5' - 3' | GGACTTCGAGCAAGAGATGG   | 20mer  |
|                  | R: 5' - 3' | AGCACTGTGTTGGCGTACAG   | 20mer  |
| E-Cadherin       | F: 5' - 3' | CGACCCAACCCAAGAATCTA   | 20mer  |
|                  | R: 5' - 3' | AGGCTGTGCCTTCTACAGA    | 20mer  |
| Vinculin         | F: 5' - 3' | CAACTCCGACTAACAGATGAGC | 22mer  |
|                  | R: 5' - 3' | TTCATCATGGAGCTGTCTGG   | 20mer  |
| $\beta$ -Catenin | F: 5' - 3' | TAGAAGCTGGTGAATGCAA    | 20mer  |
|                  | R: 5' - 3' | GCTGAACAAGAGTCCCAAGG   | 20mer  |
| RPL-19           | F: 5' - 3' | TCGATGCCGGAAAAACAC     | 18mer  |
|                  | R: 5' - 3' | TGAACACATTCCCTTCACC    | 20mer  |
